# Supplementary material for: PrediQt-Cx: Post Treatment Health Related Quality of Life Prediction Model for Cervical Cancer Patients
Source: PubMed Central journal article supplement (PMC3935936; doi:10.1371/journal.pone.0089851), 2014-02-26
Supplement: pone.0089851.s001.pdf [file pone.0089851.s001.pdf]

## Appendix S1

### Section A

### Model Development

#### Logistic Regression Model

Regularized logistic regression was applied to fit the data, as regularization helps in containing the over fitting or high variance problem [1]. We implemented logistic regression parameters  $\theta$  using gradient descent as convex optimization algorithm with an objective to minimize the cost function. The regularized cost function  $J(\theta)$  for our developed multi-class One-vs-All classifier can be represented as:

$$J(\theta) = \left[ \frac{1}{m} \sum_{i=1}^m \left[ -y^{(i)} \log(h_{\theta}(x^{(i)})) - (1 - y^{(i)}) \log(1 - h_{\theta}(x^{(i)})) \right] \right] + \frac{\lambda}{2m} \sum_{j=1}^n \theta_j^2$$

where  $h_{\theta}(x)$  is hypothesis given by the sigmoid function,  $m$ ,  $x^{(i)}$  and  $y^{(i)}$  represent training sample size, input and training class target respectively. Parameter  $\theta_0$  was not regularized while training the learning model as it was added as an intercept term and value set to 1. The gradient of the cost function is a vector where the  $j^{th}$  element is defined as follows:

$$\begin{aligned} \frac{\partial J(\theta)}{\partial \theta_0} &= \frac{1}{m} \sum_{i=1}^m \left( h_{\theta}(x^{(i)}) - y^{(i)} \right) x_j^{(i)} && \text{for } j = 0 \\ \frac{\partial J(\theta)}{\partial \theta_j} &= \left( \frac{1}{m} \sum_{i=1}^m \left( h_{\theta}(x^{(i)}) - y^{(i)} \right) x_j^{(i)} \right) + \frac{\lambda}{m} \theta_j && \text{for } j \geq 1 \end{aligned}$$

#### SVM Model

Support vector machines(SVMs) are a set of supervised learning methods which employ a subset of training points in the decision function (called support vectors) to construct a hyperplane or a set of hyperplanes in a high or infinite dimensional space. SVMs are versatile in decision function as different kernels can be specified for the same. A desirable separation is achieved by the hyperplane that has the largest functional margin, higher the margin the lower the generalization error of the classifier [2]. We

utilized Linear and Radial Basis function(RBF) kernels for model comparison.

### Neural Network Model

The Artificial Neural Networks (ANN) model used in this study was a standard feed-forward, back-propagation neural network with three layers: an input layer, a hidden layer and an output layer. Our model consists of 13 input units, 10 hidden units and 1 output unit. The hidden neuron layer extracts important features contained in the input data. The cost function and the gradient of the implemented neural network with regularization is given by:

$$J(\theta) = \frac{1}{m} \sum_{i=1}^m \sum_{k=1}^K \left[ -y_k^{(i)} \log(h_{\theta}(x^{(i)}))_k - (1 - y_k^{(i)}) \log(1 - (h_{\theta}(x^{(i)}))_k) \right] + \frac{\lambda}{2m} \left[ \sum_{j=1}^{20} \sum_{k=1}^{13} (\theta_{j,k}^{(1)})^2 + \sum_{j=1}^1 \sum_{k=1}^{13} (\theta_{j,k}^{(2)})^2 \right]$$

where  $h_{\theta}(x)$  is hypothesis,  $m, x$  and  $y$  represents the sample size, training input and training target.

## Section B

### Adjusted Mutual Information (AMI)

Adjusted Mutual Information (AMI) accounts for the fact that the MI is generally higher for two clusterings with a larger number of clusters, regardless of whether there is actually more information shared. For two clusterings U and V, the AMI is given as:

$$AMI(U, V) = \frac{[MI(U, V) - E(MI(U, V))]}{[\max(H(U), H(V)) - E(MI(U, V))]}$$

This metric is independent of the absolute values of the labels, score values are independent of the permutation of the class or cluster label values.

## References

1. Lee SI, Lee H, Abbeel P, Ng AY Efficient l1 regularized logistic regression. In: Proceedings of the Twenty-First National Conference on Artificial Intelligence (AAAI-06) (2006).
2. Guyon I, Weston J, Barnhill S, Vapnik V (2002) Gene selection for cancer classification using support vector machines. *Machine learning* 46: 389-422.
